# Supplementary material for: Dicistronic tRNA–5S rRNA genes in Yarrowia lipolytica: an alternative TFIIIA-independent way for expression of 5S rRNA genes
Source: PubMed Central journal article supplement — Nucleic Acids Res. 2008 Sep 12;36(18):5832–44. doi: 10.1093/nar/gkn549 (PMC2566860; doi:10.1093/nar/gkn549), 2008-09-12
Supplement: gkn549_1.pdf [file gkn549_1.pdf]

**Supplementary Data to:**

**Dicistronic tRNA-5S rRNA genes in *Yarrowia lipolytica*:  
an alternative TFIIIA-independent way for expression of 5S rRNA genes**

Joël Acker, Christophe Ozanne, Rym Kachouri-Lafond, Claude Gaillardin, Cécile Neuvéglise and Christian Marck

- 1- Alignment of the 117 5S rRNA gene copies from *Yarrowia lipolytica*.
- 2- Coordinates of the 47 tRNA-5S rRNA dicistronic genes and of a single tRNA-tRNA-5S rRNA tricistronic gene.
- 3- Coordinates of the 13 tDNA-Trp (CCA)-RUF70 dicistronic genes.
- 4- Sequences of oligonucleotides used for RT-PCR and cloning.
- 5- Sequences and alignment of TFIIIA orthologs in hemiascomycetes.

# 1- Alignment of the 117 5S rRNA gene copies from *Yarrowia lipolytica*.

First line in blue is 5S rRNA gene from *Saccharomyces cerevisiae*. Gene names in italic denote the 8 uncomplete copies of the 5S rRNA gene and one (*YALIOA08974r*) interrupted by a *ylt1* transposable element (the end of the sequence is not listed). There are 108 full length copies of which 48 are located 3' adjacent to a tRNA gene (hilited in yellow).

|                     | 1          |            |            |            | 50         |
|---------------------|------------|------------|------------|------------|------------|
| <i>SACE_5S</i>      | GGTTGCGGCC | ATATCTACCA | GAAAGCACCG | TTTCCCGTCC | GATCAACTGT |
| <i>YALIOE25527r</i> | .....      | .....      | .....      | ..TCTCTGA  | GTTTGACTGT |
| <i>YALIOE25229r</i> | .....GCC   | ATATCCTGGA | G.TGGTACAG | CTTCCTATCC | GACCAGCAAT |
| <i>YALIOA00786r</i> | .....      | ..ATTCTGGT | GAAAATACGG | CTTCTCGTCC | CATCAGCCTT |
| <i>YALIOE28694r</i> | .....      | .....      | GAAATAATGG | CTCCCCGTTT | GATCAACCAT |
| <i>YALIOF01414r</i> | .....      | .....GT    | GAAAATACGG | CTT.CCGTCC | GATCAGCCGT |
| <i>YALIOD23754r</i> | .....      | .....AT    | GAAAATACGG | CTT.CGGTCT | GATCTGCCAT |
| <i>YALIOA08893r</i> | .....      | .....      | .....      | .....      | .....CAT   |
| <i>YALIOB14932r</i> | AGTTGCAGCC | ATATCCTGGT | GAAAATACGG | CTTCCCGTCC | GATCAGCCAT |
| <i>YALIOA08974r</i> | GGTTACGGCC | ATATCCTGGT | GAAAATACGG | CTTCCCGTCC | GATCAGCCAT |
| <i>YALIOE30439r</i> | GGTTACGACC | ATATCTTGGT | GAAAATACGG | CTTCCCGTCC | GATCAGCCAT |
| <i>YALIOA18082r</i> | GGTCCAGGCC | ATATCCTGGT | GAAAATACGG | CTTCCCGTCC | GATCAGCCAT |
| <i>YALIOC20843r</i> | AGTTACGGCC | ATATCCTGGT | GAAAATACGG | CTTCCCGTCC | GATCAGCCAT |
| <i>YALIOB04666r</i> | GGTTACGGCC | ATATCTTGGT | GAAAATACGG | CTTCCCGTCC | GATCAGCCAT |
| <i>YALIOF09898r</i> | AGTTACGGCC | ATATCCTGGT | GAAAATACGG | CTTCCCGTCC | GATCAGCCAT |
| <i>YALIOC10404r</i> | GGTTACGGCC | ATATCCTGGT | GAAAATACGG | CTTCCCGTCC | GATCAGCCAT |
| <i>YALIOC12300r</i> | GGTTACGGCC | ATATCTTGGT | GAAAATACGG | CTTCCCGTCC | GATCAGCCAT |
| <i>YALIOA06235r</i> | GGTTACGGCC | ATATCCTGGT | GAAAATACGG | CTTCCCGTTC | GATCAGCCAT |
| <i>YALIOA13451r</i> | GGTTACGGCC | ATATCCTGGT | GAAAATACGG | CTTCCCGTTC | GATCAGCCAT |
| <i>YALIOC11189r</i> | GGTTACGGCC | ATATCCTGGT | GAAAATACGG | CTTCCCGTTC | GATCAGCCAT |
| <i>YALIOA04211r</i> | GGTTACGGCC | ATATCCTGGT | GAAAATACGG | CTTCCCGTCC | GATCAGCCAT |
| <i>YALIOA04567r</i> | GGTTACGGCC | ATATCCTGGT | GAAAATACGG | CTTCCCGTCC | GATCAGCCAT |
| <i>YALIOA12461r</i> | GGTTACGGCC | ATATCCTGGT | GAAAATACGG | CTTCCCGTCC | GATCAGCCAT |
| <i>YALIOA12993r</i> | GGTTACGGCC | ATATCCTGGT | GAAAATACGG | CTTCCCGTCC | GATCAGCCAT |
| <i>YALIOC07218r</i> | GGTTACGGCC | ATATCCTGGT | GAAAATACGG | CTTCCCGTCC | GATCAGCCAT |
| <i>YALIOC09413r</i> | GGTTACGGCC | ATATCCTGGT | GAAAATACGG | CTTCCCGTCC | GATCAGCCAT |
| <i>YALIOC17613r</i> | GGTTACGGCC | ATATCCTGGT | GAAAATACGG | CTTCCCGTCC | GATCAGCCAT |
| <i>YALIOC22811r</i> | GGTTACGGCC | ATATCCTGGT | GAAAATACGG | CTTCCCGTCC | GATCAGCCAT |
| <i>YALIOE08116r</i> | GGTTACGGCC | ATATCCTGGT | GAAAATACGG | CTTCCCGTCC | GATCAGCCAT |
| <i>YALIOA12773r</i> | GGTTACGGCC | ATATCCTGGT | GAAAATACGG | CTTCCCGTCC | GATCAGCCAT |
| <i>YALIOB00332r</i> | GGTTACGGCC | ATATCCTGGT | GAAAATACGG | CTTCCCGTCC | GATCAGCCAT |
| <i>YALIOB13026r</i> | GGTTACGGCC | ATATCCTGGT | GAAAATACGG | CTTCCCGTCC | GATCAGCCAT |
| <i>YALIOB17576r</i> | GGTTACGGCC | ATATCCTGGT | GAAAATACGG | CTTCCCGTCC | GATCAGCCAT |
| <i>YALIOB18830r</i> | GGTTACGGCC | ATATCCTGGT | GAAAATACGG | CTTCCCGTCC | GATCAGCCAT |
| <i>YALIOB21734r</i> | GGTTACGGCC | ATATCCTGGT | GAAAATACGG | CTTCCCGTCC | GATCAGCCAT |
| <i>YALIOC01806r</i> | GGTTACGGCC | ATATCCTGGT | GAAAATACGG | CTTCCCGTCC | GATCAGCCAT |
| <i>YALIOC03115r</i> | GGTTACGGCC | ATATCCTGGT | GAAAATACGG | CTTCCCGTCC | GATCAGCCAT |
| <i>YALIOC04754r</i> | GGTTACGGCC | ATATCCTGGT | GAAAATACGG | CTTCCCGTCC | GATCAGCCAT |
| <i>YALIOD10199r</i> | GGTTACGGCC | ATATCCTGGT | GAAAATACGG | CTTCCCGTCC | GATCAGCCAT |
| <i>YALIOD10349r</i> | GGTTACGGCC | ATATCCTGGT | GAAAATACGG | CTTCCCGTCC | GATCAGCCAT |
| <i>YALIOD26035r</i> | GGTTACGGCC | ATATCCTGGT | GAAAATACGG | CTTCCCGTCC | GATCAGCCAT |
| <i>YALIOE00354r</i> | GGTTACGGCC | ATATCCTGGT | GAAAATACGG | CTTCCCGTCC | GATCAGCCAT |
| <i>YALIOE12795r</i> | GGTTACGGCC | ATATCCTGGT | GAAAATACGG | CTTCCCGTCC | GATCAGCCAT |
| <i>YALIOE19835r</i> | GGTTACGGCC | ATATCCTGGT | GAAAATACGG | CTTCCCGTCC | GATCAGCCAT |
| <i>YALIOE27322r</i> | GGTTACGGCC | ATATCCTGGT | GAAAATACGG | CTTCCCGTCC | GATCAGCCAT |
| <i>YALIOE29801r</i> | GGTTACGGCC | ATATCCTGGT | GAAAATACGG | CTTCCCGTCC | GATCAGCCAT |
| <i>YALIOF05366r</i> | GGTTACGGCC | ATATCCTGGT | GAAAATACGG | CTTCCCGTCC | GATCAGCCAT |
| <i>YALIOF18060r</i> | GGTTACGGCC | ATATCCTGGT | GAAAATACGG | CTTCCCGTCC | GATCAGCCAT |
| <i>YALIOF19934r</i> | GGTTACGGCC | ATATCCTGGT | GAAAATACGG | CTTCCCGTCC | GATCAGCCAT |
| <i>YALIOF25947r</i> | GGTTACGGCC | ATATCCTGGT | GAAAATACGG | CTTCCCGTCC | GATCAGCCAT |
| <i>YALIOF26941r</i> | GGTTACGGCC | ATATCCTGGT | GAAAATACGG | CTTCCCGTCC | GATCAGCCAT |
| <i>YALIOA07269r</i> | GGTTACGGCC | ATATCCTGGT | GAAAATACGG | CTTCCCGTCC | GATCAGCCAT |
| <i>YALIOE07357r</i> | GGTTACGGCC | ATATCCTGGT | GAAAATACGG | CTTCCCGTCC | GATCAGCCAT |
| <i>YALIOE30241r</i> | GGTTACGGCC | ATATCCTGGT | GAAAATACGG | CTTCCCGTCC | GATCAGCCAT |
| <i>YALIOF26739r</i> | GGTTACGGCC | ATATCCTGGT | GAAAATACGG | CTTCCCGTCC | GATCAGCCAT |
| <i>YALIOC09055r</i> | GGTTACGGCC | ATATCCTGGT | GAAAATACGG | CTTCCCGTCC | GATCAGCCAT |
| <i>YALIOD05425r</i> | GGTTACGGCC | ATATCCTGGT | GAAAATACGG | CTTCCCGTCC | GATCAGCCAT |
| <i>YALIOB07137r</i> | GGTTGCGGCC | ATATCCTGGT | GAAAATACGG | CTTCCCGTTC | GATCAGCCAT |

YALIO019299r GGTCCAGGCC ATATCCTGGT GAAAATACCG CTTCCCGTCC CATCAGTCAT  
 YALIO05660r AGTTGCGGCT ATATCCTGGT GAAAATACGG CTTCCCGTCC GATCAGCCAT  
 YALIOB09114r CTCAACGGCC ATATCCTGGT GAAAATACGG CTTCCCGTCC GATCAGCCAT  
 YALIOA03916r AGTTGCGGCC ATATCCTGGT GAAAATACGG CTTCCCGTCC GATCAGCCAT  
 YALIOA06760r AGTTGCGGCC ATATCCTGGT GAAAATACGG CTTCCCGTCC GATCAGCCAT  
 YALIOB19987r AGTTGCGGCC ATATCCTGGT GAAAATACGG CTTCCCGTCC GATCAGCCAT  
 YALIO013717r AGTTGCGGCC ATATCCTGGT GAAAATACGG CTTCCCGTCC GATCAGCCAT  
 YALIO020922r AGTTGCGGCC ATATCCTGGT GAAAATACGG CTTCCCGTCC GATCAGCCAT  
 YALIO04840r AGTTGCGGCC ATATCCTGGT GAAAATACGG CTTCCCGTCC GATCAGCCAT  
 YALIO010627r AGTTGCGGCC ATATCCTGGT GAAAATACGG CTTCCCGTCC GATCAGCCAT  
 YALIOE07756r AGTTGCGGCC ATATCCTGGT GAAAATACGG CTTCCCGTCC GATCAGCCAT  
 YALIOE14252r AGTTGCGGCC ATATCCTGGT GAAAATACGG CTTCCCGTCC GATCAGCCAT  
 YALIOF08157r AGTTGCGGCC ATATCCTGGT GAAAATACGG CTTCCCGTCC GATCAGCCAT  
 YALIOF10581r AGTTGCGGCC ATATCCTGGT GAAAATACGG CTTCCCGTCC GATCAGCCAT  
 YALIOF16880r AGTTGCGGCC ATATCCTGGT GAAAATACGG CTTCCCGTCC GATCAGCCAT  
 YALIOA06644r AGTTGCGGCC ATATCCTGGT GAAAATACGG CTTCCCGTCC GATCAGCCAT  
 YALIO021571r AGTTGCGGCC ATATCCTGGT GAAAATACGG CTTCCCGTCC GATCAGCCAT  
 YALIOF12523r AGTTGCGGCC ATATCCTGGT GAAAATACGG CTTCCCGTCC GATCAGCCAT  
 YALIOF16725r AGTTGCGGCC ATATCCTGGT GAAAATACGG CTTCCCGTCC GATCAGCCAT  
 YALIOA14888r AGTTGCGGCC ATATCCTGGT GAAAATACGG CTTCCCGTCC GATCAGCCAT  
 YALIO00104r AGTTGCGGCC ATATCCTGGT GAAAATACGG CTTCCCGTCC GATCAGCCAT  
 YALIOA10884r AGTTGCGGCC ATATCCTGGT GAAAATACGG CTTCCCGTCC GATCAGCCAT  
 YALIOA15326r AGTTGCGGCC ATATCCTGGT GAAAATACGG CTTCCCGTCC GATCAGCCAT  
 YALIOA16145r AGTTGCGGCC ATATCCTGGT GAAAATACGG CTTCCCGTCC GATCAGCCAT  
 YALIOB09988r AGTTGCGGCC ATATCCTGGT GAAAATACGG CTTCCCGTCC GATCAGCCAT  
 YALIOB23485r AGTTGCGGCC ATATCCTGGT GAAAATACGG CTTCCCGTCC GATCAGCCAT  
 YALIO00099r AGTTGCGGCC ATATCCTGGT GAAAATACGG CTTCCCGTCC GATCAGCCAT  
 YALIO019525r AGTTGCGGCC ATATCCTGGT GAAAATACGG CTTCCCGTCC GATCAGCCAT  
 YALIO024453r AGTTGCGGCC ATATCCTGGT GAAAATACGG CTTCCCGTCC GATCAGCCAT  
 YALIO09565r AGTTGCGGCC ATATCCTGGT GAAAATACGG CTTCCCGTCC GATCAGCCAT  
 YALIOE11511r AGTTGCGGCC ATATCCTGGT GAAAATACGG CTTCCCGTCC GATCAGCCAT  
 YALIOF00099r AGTTGCGGCC ATATCCTGGT GAAAATACGG CTTCCCGTCC GATCAGCCAT  
 YALIOF13964r AGTTGCGGCC ATATCCTGGT GAAAATACGG CTTCCCGTCC GATCAGCCAT  
 YALIOF15687r AGTTGCGGCC ATATCCTGGT GAAAATACGG CTTCCCGTCC GATCAGCCAT  
 YALIOF16461r AGTTGCGGCC ATATCCTGGT GAAAATACGG CTTCCCGTCC GATCAGCCAT  
 YALIOF23886r AGTTGCGGCC ATATCCTGGT GAAAATACGG CTTCCCGTCC GATCAGCCAT  
 YALIOA10493r AGTTGCGGCC ATATCCTGGT GAAAATACGG CTTCCCGTCC GATCAGCCAT  
 YALIO018833r AGTTGCGGCC ATATCCTGGT GAAAATACGG CTTCCCGTCC GATCAGCCAT  
 YALIOA08201r GATTGCGGCC ATATCCTGGT GAAAATACGG CTTCCCGTCC GATCAGCCAT  
 YALIOF01182r GATTGCGGCC ATATCCTGGT GAAAATACGG CTTCCCGTCC GATTAGCCAT  
 YALIOA17966r GATTGCGGCC ATATCCTGGT GAAAATACGG CTTCCCGTCC GATCAGCCAT  
 YALIOB20515r GATTGCGGCC ATATCCTGGT GAAAATACGG CTTCCCGTCC GATCAGCCAT  
 YALIO00542r GATTGCGGCC ATATCCTGGT GAAAATACGG CTTCCCGTCC GATCAGCCAT  
 YALIO006671r GATTGCGGCC ATATCCTGGT GAAAATACGG CTTCCCGTCC GATCAGCCAT  
 YALIO008998r GATTGCGGCC ATATCCTGGT GAAAATACGG CTTCCCGTCC GATCAGCCAT  
 YALIO010643r GATTGCGGCC ATATCCTGGT GAAAATACGG CTTCCCGTCC GATCAGCCAT  
 YALIO008806r GATTGCGGCC ATATCCTGGT GAAAATACGG CTTCCCGTCC GATCAGCCAT  
 YALIOE19167r GATTGCGGCC ATATCCTGGT GAAAATACGG CTTCCCGTCC GATCAGCCAT  
 YALIOE23480r GATTGCGGCC ATATCCTGGT GAAAATACGG CTTCCCGTCC GATCAGCCAT  
 YALIOE24111r GATTGCGGCC ATATCCTGGT GAAAATACGG CTTCCCGTCC GATCAGCCAT  
 YALIOE26399r GATTGCGGCC ATATCCTGGT GAAAATACGG CTTCCCGTCC GATCAGCCAT  
 YALIOF06518r GATTGCGGCC ATATCCTGGT GAAAATACGG CTTCCCGTCC GATCAGCCAT  
 YALIOF07200r GATTGCGGCC ATATCCTGGT GAAAATACGG CTTCCCGTCC GATCAGCCAT  
 YALIOF15791r GATTGCGGCC ATATCCTGGT GAAAATACGG CTTCCCGTCC GATCAGCCAT  
 YALIOA16600r GATTGCGGCC ATATCCTGGT GAAAATACGG CTTCCCGTCC GATCAGCCAT  
 YALIOB08349r GATTGCGGCC ATATCCTGGT GAAAATACGG CTTCCCGTCC GATCAGCCAT  
 YALIO010218r GATTGCGGCC ATATCCTGGT GAAAATACGG CTTCCCGTCC GATCAGCCAT  
 YALIO021203r GATTGCGGCC ATATCCTGGT GAAAATACGG CTTCCCGTCC GATCAGCCAT  
 YALIO005312r GATTGCGGCC ATATCCTGGT GAAAATACGG CTTCCCGTCC GATCAGCCAT  
 YALIO016281r GATTGCGGCC ATATCCTGGT GAAAATACGG CTTCCCGTCC GATCAGCCAT

SACE\_5S AGTTAAGCTG G..TAAGAGC CTGACCGAGT AGTGTAGTGG GTGACCATAC

YALIOE25527r AGCTGATCGG AC.TGGAAGC CGTATT...T TCTTCAGGAT ATGGCC....

YALIOE25229r AGTCAAGCAC C..AGAGAGC CCAGTT.GTT ATTGTAGTTG GATACCATA.

YALIOA00786r AGTCAACCAC C..AGGGAGC CTAG.....

YALIOE28694r AGTAAAGCAC C..AGAGAG. ....

YALIOF01414r AGTCAAGCAC C..AGATAGC CCAATT.AGT ATTGTAGTGG GAGACCCTAC

YALIOD23754r AGTCAAGCAC C..AGAGAGC CCAG.....

YALIOA08893r AGTCAAGCAC C..AGAGAGC CCAGTT.AGT GTTGTAGTGG GAGACCATAC

YALIOB14932r AGTCAAGCAC C..AGAGAGC CTAGTT.AGT ATTGTAGTGG GAGACCATAC

YALIOA08974r A.....

YALIOE30439r AGTCAAGCAC C..AGAGAGC CTAGTT.AGT ATTATAGTGG GAGACCATAC

YALIOA18082r AGTCAAGCAC C..AGAGAGC CTAGTT.AGT ATTGTAGTGG GAGACCATAC

YALIOC20843r AGTCAAGCAC C..AGAGAGT CTAGTT.AGT ATTGTAGTGG GAGACCATAC

YALIOB04666r AGTCAAGCAC C..AGAGAGC CCAGTT.AGT ATTGTAGTGG GAGACCATAC

YALIOF09898r AGTCAAGCAC C..AGAGAGC CTAGTT.AGT ATTGTAGTGG GAGACCATAC

YALIOC10404r AGTCAAGCAC C..AGAGAGC CCAGTT.AGT ATTGTAGTGG GAGACCATAC

YALIOC12300r AGTCAAGCAC C..AGAGAGC CTAGTT.AGT ATTGTAGTGG GAGACCATAC

YALIOA06235r AGTCAAGCAC C..AGAGAGC CCAGTT.AGT ATTGTAGTGG GAGACCATAC

YALIOA13451r AGTCAAGCAC C..AGAGAGC CCAGTT.AGT ATTGTAGTGG GAGACCATAC

YALIOC11189r AGTCAAGCAC C..AGAGAGC CCAGTT.AGT ATTGTAGTGG GAGACCATAC

YALIOA04211r AGTCAAGCAC C..AGAGAGC CCAGTT.AGT ATTGTAGTGG GAGACCATAC

YALIOA04567r AGTCAAGCAC C..AGAGAGC CCAGTT.AGT ATTGTAGTGG GAGACCATAC

YALIOA12461r AGTCAAGCAC C..AGAGAGC CCAGTT.AGT ATTGTAGTGG GAGACCATAC

YALIOA12993r AGTCAAGCAC C..AGAGAGC CCAGTT.AGT ATTGTAGTGG GAGACCATAC

YALIOC07218r AGTCAAGCAC C..AGAGAGC CCAGTT.AGT ATTGTAGTGG GAGACCATAC

YALIOC09413r AGTCAAGCAC C..AGAGAGC CCAGTT.AGT ATTGTAGTGG GAGACCATAC

YALIOC17613r AGTCAAGCAC C..AGAGAGC CCAGTT.AGT ATTGTAGTGG GAGACCATAC

YALIOC22811r AGTCAAGCAC C..AGAGAGC CCAGTT.AGT ATTGTAGTGG GAGACCATAC

YALIOE08116r AGTCAAGCAC C..AGAGAGC CCAGTT.AGT ATTGTAGTGG GAGACCATAC

YALIOA12773r AGTCAAGCAC C..AGAGAGC CTAGTT.AGT ATTGTAGTGG GAGACCATAC

YALIOB00332r AGTCAAGCAC C..AGAGAGC CTAGTT.AGT ATTGTAGTGG GAGACCATAC

YALIOB13026r AGTCAAGCAC C..AGAGAGC CTAGTT.AGT ATTGTAGTGG GAGACCATAC

YALIOB17576r AGTCAAGCAC C..AGAGAGC CTAGTT.AGT ATTGTAGTGG GAGACCATAC

YALIOB18830r AGTCAAGCAC C..AGAGAGC CTAGTT.AGT ATTGTAGTGG GAGACCATAC

YALIOB21734r AGTCAAGCAC C..AGAGAGC CTAGTT.AGT ATTGTAGTGG GAGACCATAC

YALIOC01806r AGTCAAGCAC C..AGAGAGC CTAGTT.AGT ATTGTAGTGG GAGACCATAC

YALIOC03115r AGTCAAGCAC C..AGAGAGC CTAGTT.AGT ATTGTAGTGG GAGACCATAC

YALIOC04754r AGTCAAGCAC C..AGAGAGC CTAGTT.AGT ATTGTAGTGG GAGACCATAC

YALIOD10199r AGTCAAGCAC C..AGAGAGC CTAGTT.AGT ATTGTAGTGG GAGACCATAC

YALIOD10349r AGTCAAGCAC C..AGAGAGC CTAGTT.AGT ATTGTAGTGG GAGACCATAC

YALIOD26035r AGTCAAGCAC C..AGAGAGC CTAGTT.AGT ATTGTAGTGG GAGACCATAC

YALIOE00354r AGTCAAGCAC C..AGAGAGC CTAGTT.AGT ATTGTAGTGG GAGACCATAC

YALIOE12795r AGTCAAGCAC C..AGAGAGC CTAGTT.AGT ATTGTAGTGG GAGACCATAC

YALIOE19835r AGTCAAGCAC C..AGAGAGC CTAGTT.AGT ATTGTAGTGG GAGACCATAC

YALIOE27322r AGTCAAGCAC C..AGAGAGC CTAGTT.AGT ATTGTAGTGG GAGACCATAC

YALIOE29801r AGTCAAGCAC C..AGAGAGC CTAGTT.AGT ATTGTAGTGG GAGACCATAC

YALIOF05366r AGTCAAGCAC C..AGAGAGC CTAGTT.AGT ATTGTAGTGG GAGACCATAC

YALIOF18060r AGTCAAGCAC C..AGAGAGC CTAGTT.AGT ATTGTAGTGG GAGACCATAC

YALIOF19934r AGTCAAGCAC C..AGAGAGC CTAGTT.AGT ATTGTAGTGG GAGACCATAC

YALIOF25947r AGTCAAGCAC C..AGAGAGC CTAGTT.AGT ATTGTAGTGG GAGACCATAC

YALIOF26941r AGTCAAGCAC C..AGAGAGC CTAGTT.AGT ATTGTAGTGG GAGACCATAC

YALIOA07269r AGTCAAGCTC C..AGAGAGC CCAATT.AGT ATTGTAGTGG GAGACCATAC

YALIOE07357r AGTCAAGCAC C..AGAGAGC CCAGTT.AGT ATTGTAGTGG GAGACCATAC

YALIOE30241r AGTCAAGCAC C..AGAGAGC CTAGCT.AGT ATTGTAGTGG GAGACCATAC

YALIOF26739r AGTCAAGCAC C..AGAGAGC CTAGTT.AGT ATTGTAGTGG GAGACCATAC

YALIOC09055r AGTCAAGCAC C..AGAGAGC CTAGTT.AGT ATTGTAGTGG GAGACCATAC

YALIOD05425r AGTCAAGCAC C..AGAGAGC CTAGTT.AGT ATTGTAGTGG GAGACCATAC

YALIOB07137r AGTCAAGCAC C..AGAGAGC CTAGTT.AGT ATTGTAGTGG GAGACCATAC

YALIO0D19299r AGTCTAGCAC C..AGAGAGC CCAGTT.GGT ACTGTTTTGG GAGACCATAAC  
YALIO0D05660r AGTCAAGCAC CAGAGAGAGC CTAGTT.AGT ATTGTAGCGT GAGACCAAAAC  
YALIO0B09114r AGTCAAGCAC C..AGAGAGC CCAGTT.AGT ATTGTAGTGG GAGACCATAC  
YALIO0A03916r AGTCAAGCAC C..AGAGAGC CCAGTT.AGT ATTGTAGTGG GAGACCATAC  
YALIO0A06760r AGTCAAGCAC C..AGAGAGC CTAGTT.AGT ATTGTAGTGG GAGACCATAC  
YALIO0B19987r AGTCAAGCAC C..AGAGAGC CTAGTT.AGT ATTGTAGTGG GAGACCATAC  
YALIO0C13717r AGTCAAGCAC C..AGAGAGC CTAGTT.AGT ATTGTAGTGG GAGACCATAC  
YALIO0C20922r AGTCAAGCAC C..AGAGAGC CTAGTT.AGT ATTGTAGTGG GAGACCATAC  
YALIO0D04840r AGTCAAGCAC C..AGAGAGC CTAGTT.AGT ATTGTAGTGG GAGACCATAC  
YALIO0D10627r AGTCAAGCAC C..AGAGAGC CTAGTT.AGT ATTGTAGTGG GAGACCATAC  
YALIO0E07756r AGTCAAGCAC C..AGAGAGC CTAGTT.AGT ATTGTAGTGG GAGACCATAC  
YALIO0E14252r AGTCAAGCAC C..AGAGAGC CTAGTT.AGT ATTGTAGTGG GAGACCATAC  
YALIO0F08157r AGTCAAGCAC C..AGAGAGC CTAGTT.AGT ATTGTAGTGG GAGACCATAC  
YALIO0F10581r AGTCAAGCAC C..AGAGAGC CTAGTT.AGT ATTGTAGTGG GAGACCATAC  
YALIO0F16880r AGTCAAGCAC C..AGAGAGC CTAGTT.AGT ATTGTAGTGG GAGACCATAC  
YALIO0A06644r AGTCAAGCAC C..AGAGAGC CTAGTT.AGT ATTGTAGTGG GAGACCATAC  
YALIO0C21571r AGTCAAGCAC C..AGAGAGC CTAGTT.AGT ATTGTAGTGG GAGACCATAC  
YALIO0F12523r AGTCAAGCAC C..AGAGAGC CTAGTT.AGT ATTGTAGTGG GAGACCATAC  
YALIO0F16725r AGTCAAGCAC C..AGAGAGC CTAGTT.AGT ATTGTAGTGG GAGACCATAC  
YALIO0A14888r AGTCAAGCAC C..AGAGAGC CCAGTT.AGT ATTGTAGTGG GAGACCATAC  
YALIO0D00104r AGTCAAGCAC C..AGAGAGC CCAGTT.AGT ATTGTAGTGG GAGACCATAC  
YALIO0A10884r AGTCAAGCAC C..AGAGAGC CCAGTT.AGT ATTGTAGTGG GAGACCATAC  
YALIO0A15326r AGTCAAGCAC C..AGAGAGC CCAGTT.AGT ATTGTAGTGG GAGACCATAC  
YALIO0A16145r AGTCAAGCAC C..AGAGAGC CCAGTT.AGT ATTGTAGTGG GAGACCATAC  
YALIO0B09988r AGTCAAGCAC C..AGAGAGC CCAGTT.AGT ATTGTAGTGG GAGACCATAC  
YALIO0B23485r AGTCAAGCAC C..AGAGAGC CCAGTT.AGT ATTGTAGTGG GAGACCATAC  
YALIO0C00099r AGTCAAGCAC C..AGAGAGC CCAGTT.AGT ATTGTAGTGG GAGACCATAC  
YALIO0C19525r AGTCAAGCAC C..AGAGAGC CCAGTT.AGT ATTGTAGTGG GAGACCATAC  
YALIO0C24453r AGTCAAGCAC C..AGAGAGC CCAGTT.AGT ATTGTAGTGG GAGACCATAC  
YALIO0D09565r AGTCAAGCAC C..AGAGAGC CCAGTT.AGT ATTGTAGTGG GAGACCATAC  
YALIO0E11511r AGTCAAGCAC C..AGAGAGC CCAGTT.AGT ATTGTAGTGG GAGACCATAC  
YALIO0F00099r AGTCAAGCAC C..AGAGAGC CCAGTT.AGT ATTGTAGTGG GAGACCATAC  
YALIO0F13964r AGTCAAGCAC C..AGAGAGC CCAGTT.AGT ATTGTAGTGG GAGACCATAC  
YALIO0F15687r AGTCAAGCAC C..AGAGAGC CCAGTT.AGT ATTGTAGTGG GAGACCATAC  
YALIO0F16461r AGTCAAGCAC C..AGAGAGC CCAGTT.AGT ATTGTAGTGG GAGACCATAC  
YALIO0F23886r AGTCAAGCAC C..AGAGAGC CCAGTT.AGT ATTGTAGTGG GAGACCATAC  
YALIO0A10493r AGTCAAGCAC C..AGAGAGC CCAGTT.AGT ATTGTAGTGG GAGACCATAC  
YALIO0C18833r AGTCAAGCAC C..AGAGAGC CCAGTT.AGT ATTGTAGTGG GAGACCATAC  
YALIO0A08201r AGTCAAGCAC C..AGAGAGC CCAGTT.AGT ATTGTAGTGG GAGACCATAC  
YALIO0F01182r AGTCAAGCAC C..AGAGAGC CTAGTT.AGT ATTGTAGTGG GAGACCATAC  
YALIO0A17966r AGTCAAGCAC C..AGAGAGC CTAGTT.AGT ATTGTAGTGG GAGACCATAC  
YALIO0B20515r AGTCAAGCAC C..AGAGAGC CTAGTT.AGT ATTGTAGTGG GAGACCATAC  
YALIO0C05542r AGTCAAGCAC C..AGAGAGC CTAGTT.AGT ATTGTAGTGG GAGACCATAC  
YALIO0C06671r AGTCAAGCAC C..AGAGAGC CTAGTT.AGT ATTGTAGTGG GAGACCATAC  
YALIO0C08998r AGTCAAGCAC C..AGAGAGC CTAGTT.AGT ATTGTAGTGG GAGACCATAC  
YALIO0C10643r AGTCAAGCAC C..AGAGAGC CTAGTT.AGT ATTGTAGTGG GAGACCATAC  
YALIO0D08806r AGTCAAGCAC C..AGAGAGC CTAGTT.AGT ATTGTAGTGG GAGACCATAC  
YALIO0E19167r AGTCAAGCAC C..AGAGAGC CTAGTT.AGT ATTGTAGTGG GAGACCATAC  
YALIO0E23480r AGTCAAGCAC C..AGAGAGC CTAGTT.AGT ATTGTAGTGG GAGACCATAC  
YALIO0E24111r AGTCAAGCAC C..AGAGAGC CTAGTT.AGT ATTGTAGTGG GAGACCATAC  
YALIO0E26399r AGTCAAGCAC C..AGAGAGC CTAGTT.AGT ATTGTAGTGG GAGACCATAC  
YALIO0F06518r AGTCAAGCAC C..AGAGAGC CTAGTT.AGT ATTGTAGTGG GAGACCATAC  
YALIO0F07200r AGTCAAGCAC C..AGAGAGC CTAGTT.AGT ATTGTAGTGG GAGACCATAC  
YALIO0F15791r AGTCAAGCAC C..AGAGAGC CTAGTT.AGT ATTGTAGTGG GAGACCATAC  
YALIO0A16600r AGTCAAGCAC C..AGAGAGC CCAGTT.AGT ATTGTAGTGG GAGACCATAC  
YALIO0B08349r AGTCAAGCAC C..AGAGAGC CCAGTT.AGT ATTGTAGTGG GAGACCATAC  
YALIO0C10218r AGTCAAGCAC C..AGAGAGC CCAGTT.AGT ATTGTAGTGG GAGACCATAT  
YALIO0D21203r AGTCAAGCAC C..AGAGAGC CCAGTT.AGT ATTGTAGTGG GAGACCATAC  
YALIO0C05312r AGTCAAGCAC C..AGAGAGC CCAGTT.AGT ATTGTAGTGG GAGACCATAC  
YALIO0D16281r AGTCAAGCAC C..AGAGAGC CCAGTT.AGT ATTGTAGTGG GAGACCATAC

|                     | 101               | 127               |                |
|---------------------|-------------------|-------------------|----------------|
| <i>SACE_5S</i>      | <i>GCGAAACTCA</i> | <i>GGTGCTGCAA</i> | <i>TCTTTAT</i> |
| <i>YALIOE25527r</i> | .....             | .....             | .....          |
| <i>YALIOE25229r</i> | .....             | .....             | .....          |
| <i>YALIOA00786r</i> | .....             | .....             | .....          |
| <i>YALIOE28694r</i> | .....             | .....             | .....          |
| <i>YALIOF01414r</i> | CAGCATCCTG        | GGTGCTGCCA        | TTC....        |
| <i>YALIOD23754r</i> | .....             | .....             | .....          |
| <i>YALIOA08893r</i> | GAGAATCCTG        | GGTGCTGTAA        | TC.....        |
| <i>YALIOB14932r</i> | GAGAATCC..        | .....             | .....          |
| <i>YALIOA08974r</i> | .....             | .....             | .....          |
| <i>YALIOE30439r</i> | GAGAATCCTG        | GGTGTGTAA         | TT.....        |
| <i>YALIOA18082r</i> | GAGAATCCTG        | GGTGCTGTAA        | TC.....        |
| <i>YALIOC20843r</i> | GAGAATCCTG        | GGTGCTGTAA        | TT.....        |
| <i>YALIOB04666r</i> | GAGAATCCTG        | GGTGCTGTAA        | CC.....        |
| <i>YALIOF09898r</i> | GAGAATCCTG        | GGTGCTGTAA        | TC.....        |
| <i>YALIOC10404r</i> | GAGAATCCTG        | GGTGCTGTAA        | TC.....        |
| <i>YALIOC12300r</i> | GAGAATCCTG        | GGTGCTGTAA        | TC.....        |
| <i>YALIOA06235r</i> | GAGAATCCTG        | GGTGCTGTAA        | TC.....        |
| <i>YALIOA13451r</i> | GAGAATCCTG        | GGTGCTGTAA        | TC.....        |
| <i>YALIOC11189r</i> | GAGAATCCTG        | GGTGCTGTAA        | TC.....        |
| <i>YALIOA04211r</i> | GAGAATCCTG        | GGTGCTGTAA        | TC.....        |
| <i>YALIOA04567r</i> | GAGAATCCTG        | GGTGCTGTAA        | TC.....        |
| <i>YALIOA12461r</i> | GAGAATCCTG        | GGTGCTGTAA        | TC.....        |
| <i>YALIOA12993r</i> | GAGAATCCTG        | GGTGCTGTAA        | TC.....        |
| <i>YALIOC07218r</i> | GAGAATCCTG        | GGTGCTGTAA        | TC.....        |
| <i>YALIOC09413r</i> | GAGAATCCTG        | GGTGCTGTAA        | TC.....        |
| <i>YALIOC17613r</i> | GAGAATCCTG        | GGTGCTGTAA        | TC.....        |
| <i>YALIOC22811r</i> | GAGAATCCTG        | GGTGCTGTAA        | TC.....        |
| <i>YALIOE08116r</i> | GAGAATCCTG        | GGTGCTGTAA        | TC.....        |
| <i>YALIOA12773r</i> | GAGAATCCTG        | GGTGCTGTAA        | TC.....        |
| <i>YALIOB00332r</i> | GAGAATCCTG        | GGTGCTGTAA        | TC.....        |
| <i>YALIOB13026r</i> | GAGAATCCTG        | GGTGCTGTAA        | TC.....        |
| <i>YALIOB17576r</i> | GAGAATCCTG        | GGTGCTGTAA        | TC.....        |
| <i>YALIOB18830r</i> | GAGAATCCTG        | GGTGCTGTAA        | TC.....        |
| <i>YALIOB21734r</i> | GAGAATCCTG        | GGTGCTGTAA        | TC.....        |
| <i>YALIOC01806r</i> | GAGAATCCTG        | GGTGCTGTAA        | TC.....        |
| <i>YALIOC03115r</i> | GAGAATCCTG        | GGTGCTGTAA        | TC.....        |
| <i>YALIOC04754r</i> | GAGAATCCTG        | GGTGCTGTAA        | TC.....        |
| <i>YALIOD10199r</i> | GAGAATCCTG        | GGTGCTGTAA        | TC.....        |
| <i>YALIOD10349r</i> | GAGAATCCTG        | GGTGCTGTAA        | TC.....        |
| <i>YALIOD26035r</i> | GAGAATCCTG        | GGTGCTGTAA        | TC.....        |
| <i>YALIOE00354r</i> | GAGAATCCTG        | GGTGCTGTAA        | TC.....        |
| <i>YALIOE12795r</i> | GAGAATCCTG        | GGTGCTGTAA        | TC.....        |
| <i>YALIOE19835r</i> | GAGAATCCTG        | GGTGCTGTAA        | TC.....        |
| <i>YALIOE27322r</i> | GAGAATCCTG        | GGTGCTGTAA        | TC.....        |
| <i>YALIOE29801r</i> | GAGAATCCTG        | GGTGCTGTAA        | TC.....        |
| <i>YALIOF05366r</i> | GAGAATCCTG        | GGTGCTGTAA        | TC.....        |
| <i>YALIOF18060r</i> | GAGAATCCTG        | GGTGCTGTAA        | TC.....        |
| <i>YALIOF19934r</i> | GAGAATCCTG        | GGTGCTGTAA        | TC.....        |
| <i>YALIOF25947r</i> | GAGAATCCTG        | GGTGCTGTAA        | TC.....        |
| <i>YALIOF26941r</i> | GAGAATCCTG        | GGTGCTGTAA        | TC.....        |
| <i>YALIOA07269r</i> | GAGAATCCTG        | GGTGCTGTAA        | TC.....        |
| <i>YALIOE07357r</i> | GAGAATCCTG        | GGTGCTGTAA        | TT.....        |
| <i>YALIOE30241r</i> | GAGAATCCTG        | GGTGCTGTAA        | TT.....        |
| <i>YALIOF26739r</i> | GAGAATCCTG        | GGTGCTGTAA        | TT.....        |
| <i>YALIOC09055r</i> | GAGAATCCTA        | GGTGCTGTAA        | TC.....        |
| <i>YALIOD05425r</i> | GAGAATCCTA        | GGTGCTGTAA        | TC.....        |
| <i>YALIOB07137r</i> | GAGAATCCTA        | GGTGCTGCAA        | TC.....        |

YALI0D19299r GAGAATCTCC GGTGCTGCAA TC.....  
YALI0D05660r GAGAATCCTG GATGCTGCAA TT.....  
YALI0B09114r GAGAATCCTG GGTGCTGCAA TC.....  
YALI0A03916r GAGAATCCTA GGTGCTGCAA TT.....  
YALI0A06760r GAGAATCCTA GGTGCTGCAA TT.....  
YALI0B19987r GAGAATCCTA GGTGCTGCAA TTC.....  
YALI0C13717r GAGAATCCTA GGTGCTGCAA TT.....  
YALI0C20922r GAGAATCCTA GGTGCTGCAA TT.....  
YALI0D04840r GAGAATCCTA GGTGCTGCAA TT.....  
YALI0D10627r GAGAATCCTA GGTGCTGCAA TT.....  
YALI0E07756r GAGAATCCTA GGTGCTGCAA TT.....  
YALI0E14252r GAGAATCCTA GGTGCTGCAA TT.....  
YALI0F08157r GAGAATCCTA GGTGCTGCAA TT.....  
YALI0F10581r GAGAATCCTA GGTGCTGCAA TT.....  
YALI0F16880r GAGAATCCTA GGTGCTGCAA TT.....  
YALI0A06644r GAGAATCCTG GGTGCTGCAA TT.....  
YALI0C21571r GAGAATCCTG GGTGCTGCAA TT.....  
YALI0F12523r GAGAATCCTG GGTGCTGCAA TT.....  
YALI0F16725r GAGAATCCTG GGTGCTGCAA TT.....  
YALI0A14888r GAGAATCCTG GGTGCTGCAA TT.....  
YALI0D00104r GAGAATCCTG GGTGCTGCAA TT.....  
YALI0A10884r GAGAATCCTG GGTGCTGCAA TT.....  
YALI0A15326r GAGAATCCTG GGTGCTGCAA TT.....  
YALI0A16145r GAGAATCCTG GGTGCTGCAA TT.....  
YALI0B09988r GAGAATCCTG GGTGCTGCAA TT.....  
YALI0B23485r GAGAATCCTG GGTGCTGCAA TT.....  
YALI0C00099r GAGAATCCTG GGTGCTGCAA TT.....  
YALI0C19525r GAGAATCCTG GGTGCTGCAA TT.....  
YALI0C24453r GAGAATCCTG GGTGCTGCAA TT.....  
YALI0D09565r GAGAATCCTG GGTGCTGCAA TT.....  
YALI0E11511r GAGAATCCTG GGTGCTGCAA TT.....  
YALI0F00099r GAGAATCCTG GGTGCTGCAA TT.....  
YALI0F13964r GAGAATCCTG GGTGCTGCAA TT.....  
YALI0F15687r GAGAATCCTG GGTGCTGCAA TT.....  
YALI0F16461r GAGAATCCTG GGTGCTGCAA TT.....  
YALI0F23886r GAGAATCCTG GGTGCTGCAA TT.....  
YALI0A10493r GAGAATCCTT GGTGTTGCAA TT.....  
YALI0C18833r GAGAATCCTT GGTGCTGCAA TT.....  
YALI0A08201r GAGAATCCTA GGTGCTGCAA TC.....  
YALI0F01182r GAGAATCCTG GGTGCTGCAA TC.....  
YALI0A17966r GAGAATCCTG GGTGCTGCAA TC.....  
YALI0B20515r GAGAATCCTG GGTGCTGCAA TC.....  
YALI0C05542r GAGAATCCTG GGTGCTGCAA TC.....  
YALI0C06671r GAGAATCCTG GGTGCTGCAA TC.....  
YALI0C08998r GAGAATCCTG GGTGCTGCAA TC.....  
YALI0C10643r GAGAATCCTG GGTGCTGCAA TC.....  
YALI0D08806r GAGAATCCTG GGTGCTGCAA TC.....  
YALI0E19167r GAGAATCCTG GGTGCTGCAA TC.....  
YALI0E23480r GAGAATCCTG GGTGCTGCAA TC.....  
YALI0E24111r GAGAATCCTG GGTGCTGCAA TC.....  
YALI0E26399r GAGAATCCTG GGTGCTGCAA TC.....  
YALI0F06518r GAGAATCCTG GGTGCTGCAA TC.....  
YALI0F07200r GAGAATCCTG GGTGCTGCAA TC.....  
YALI0F15791r GAGAATCCTG GGTGCTGCAA TC.....  
YALI0A16600r GAGAATCCTA GGTGCTGCAA TC.....  
YALI0B08349r GAGAATCCTG GGTGCCGCAA TC.....  
YALI0C10218r GAGAATCCTG GGTGCTGCAA TC.....  
YALI0D21203r GAGAATCCTG GGTGCTGCAA TC.....  
YALI0C05312r GAGAATCCTG GGTGCTGCAA TC.....  
YALI0D16281r GAGAATCCTG GGTGCTGCAA TC.....

## 2- Coordinates of the 47 tRNA-5S rRNA dicistronic genes and of a single tRNA-tRNA-5S rRNA tricistronic gene.

| Gene #       | Begin   | End     | Strand | Gene type                 | intergenic distance |
|--------------|---------|---------|--------|---------------------------|---------------------|
| -----        | -----   | -----   | -      | -----                     | --                  |
| YALIOA04211r | 456779  | 456897  | c      | 5SRNA                     | 4                   |
| YALIOA04213r | 456902  | 456972  | c      | tRNA Gly (GCC) cove=64.77 |                     |
| YALIOA04565r | 484054  | 484124  |        | tRNA Gly (GCC) cove=64.77 | 4                   |
| YALIOA04567r | 484129  | 484247  |        | 5SRNA                     |                     |
| YALIOA06235r | 614877  | 614995  | c      | 5SRNA                     | 4                   |
| YALIOA06237r | 615000  | 615070  | c      | tRNA Gly (GCC) cove=64.77 |                     |
| YALIOA07269r | 712090  | 712208  | c      | 5SRNA                     | 4                   |
| YALIOA07271r | 712213  | 712283  | c      | tRNA Gly (GCC) cove=64.77 |                     |
| YALIOA12461r | 1297180 | 1297298 | c      | 5SRNA                     | 4                   |
| YALIOA12463r | 1297303 | 1297383 | c      | tRNA Glu (CTC) cove=60.91 |                     |
| YALIOA12771r | 1318253 | 1318323 |        | tRNA Gly (GCC) cove=64.77 | 4                   |
| YALIOA12773r | 1318328 | 1318446 |        | 5SRNA                     |                     |
| YALIOA12991r | 1334940 | 1335010 |        | tRNA Gly (GCC) cove=64.77 | 4                   |
| YALIOA12993r | 1335015 | 1335133 |        | 5SRNA                     |                     |
| YALIOA13451r | 1385398 | 1385516 | c      | 5SRNA                     | 4                   |
| YALIOA13453r | 1385521 | 1385608 | c      | tRNA Asp (GTC) cove=57.55 |                     |
| YALIOA18082r | 1883168 | 1883286 | c      | 5SRNA                     | 4                   |
| YALIOA18084r | 1883291 | 1883371 | c      | tRNA Glu (CTC) cove=60.91 |                     |
| YALIOB00330r | 25708   | 25788   |        | tRNA Glu (CTC) cove=58.38 | 4                   |
| YALIOB00332r | 25793   | 25911   |        | 5SRNA                     |                     |
| YALIOB04664r | 636203  | 636273  |        | tRNA Gly (GCC) cove=64.77 | 5                   |
| YALIOB04666r | 636279  | 636397  |        | 5SRNA                     |                     |
| YALIOB07137r | 946403  | 946521  | c      | 5SRNA                     | 7                   |
| YALIOB07139r | 946529  | 946600  | c      | tRNA Thr (AGT) cove=74.31 |                     |
| YALIOB13024r | 1745449 | 1745519 |        | tRNA Gly (GCC) cove=64.77 | 4                   |
| YALIOB13026r | 1745524 | 1745642 |        | 5SRNA                     |                     |
| YALIOB17576r | 2299263 | 2299381 | c      | 5SRNA                     | 4                   |
| YALIOB17578r | 2299386 | 2299473 | c      | tRNA Asp (GTC) cove=56.78 |                     |
| YALIOB18830r | 2475555 | 2475673 | c      | 5SRNA                     | 4                   |
| YALIOB18832r | 2475678 | 2475748 | c      | tRNA Gly (GCC) cove=64.77 |                     |
| YALIOB21734r | 2859341 | 2859459 | c      | 5SRNA                     | 4                   |
| YALIOB21736r | 2859464 | 2859544 | c      | tRNA Glu (CTC) cove=60.91 |                     |
| YALIOC01804r | 251371  | 251441  |        | tRNA Gly (GCC) cove=64.77 | 4                   |
| YALIOC01806r | 251446  | 251564  |        | 5SRNA                     |                     |
| YALIOC03113r | 417851  | 417921  |        | tRNA Gly (GCC) cove=64.77 | 4                   |
| YALIOC03115r | 417926  | 418044  |        | 5SRNA                     |                     |
| YALIOC04752r | 624935  | 625005  |        | tRNA Gly (GCC) cove=64.77 | 4                   |
| YALIOC04754r | 625010  | 625128  |        | 5SRNA                     |                     |
| YALIOC07216r | 963247  | 963317  |        | tRNA Gly (GCC) cove=64.77 | 4                   |
| YALIOC07218r | 963322  | 963440  |        | 5SRNA                     |                     |
| YALIOC09053r | 1238222 | 1238292 |        | tRNA Gly (GCC) cove=64.77 | 5                   |
| YALIOC09055r | 1238298 | 1238416 |        | 5SRNA                     |                     |
| YALIOC09413r | 1286546 | 1286664 | c      | 5SRNA                     | 5                   |
| YALIOC09416r | 1286670 | 1286740 | c      | tRNA Gly (GCC) cove=64.77 |                     |
| YALIOC10404r | 1447991 | 1448109 | c      | 5SRNA                     | 5                   |
| YALIOC10406r | 1448115 | 1448185 | c      | tRNA Gly (GCC) cove=64.77 |                     |
| YALIOC10643r | 1473976 | 1474094 |        | 5SRNA                     |                     |



|               |         |         |   |                           |    |
|---------------|---------|---------|---|---------------------------|----|
| YALIO1C11187r | 1543852 | 1543922 |   | tRNA Gly (GCC) cove=64.77 | 5  |
| YALIO1C12298r | 1705002 | 1705072 |   | tRNA Gly (GCC) cove=64.77 | 4  |
| YALIO1C12300r | 1705077 | 1705195 |   | 5SRNA                     |    |
| YALIO1C17611r | 2463226 | 2463296 |   | tRNA Gly (GCC) cove=64.77 | 4  |
| YALIO1C17613r | 2463301 | 2463419 |   | 5SRNA                     |    |
| YALIO1C20843r | 2795011 | 2795129 | c | 5SRNA                     | 4  |
| YALIO1C20845r | 2795134 | 2795214 | c | tRNA Glu (CTC) cove=60.14 |    |
| YALIO1C22811r | 3062616 | 3062734 | c | 5SRNA                     | 4  |
| YALIO1C22814r | 3062739 | 3062809 | c | tRNA Gly (GCC) cove=64.77 |    |
| YALIO1D05423r | 705811  | 705891  |   | tRNA Glu (CTC) cove=60.91 | 4  |
| YALIO1D05425r | 705896  | 706014  |   | 5SRNA                     |    |
| YALIO1D10197r | 1289703 | 1289788 |   | tRNA Asp (GTC) cove=57.93 | 4  |
| YALIO1D10199r | 1289793 | 1289911 |   | 5SRNA                     |    |
| YALIO1D10349r | 1303013 | 1303131 | c | 5SRNA                     | 4  |
| YALIO1D10351r | 1303136 | 1303221 | c | tRNA Asp (GTC) cove=57.16 |    |
| YALIO1D26035r | 3463039 | 3463157 | c | 5SRNA                     | 4  |
| YALIO1D26037r | 3463162 | 3463242 | c | tRNA Glu (CTC) cove=60.77 |    |
| YALIO1E00352r | 36748   | 36828   |   | tRNA Glu (CTC) cove=60.77 | 4  |
| YALIO1E00354r | 36833   | 36951   |   | 5SRNA                     |    |
| YALIO1E07357r | 843297  | 843415  | c | 5SRNA                     | 5  |
| YALIO1E07359r | 843421  | 843491  | c | tRNA Gly (GCC) cove=64.77 |    |
| YALIO1E08116r | 956044  | 956162  | c | 5SRNA                     | 4  |
| YALIO1E08118r | 956167  | 956257  | c | tRNA Asp (GTC) cove=58.99 |    |
| YALIO1E12749r | 1552681 | 1552761 |   | tRNA Lys (CTT) cove=65.44 | 17 |
| YALIO1E12793r | 1552779 | 1552870 |   | tRNA Glu (CTC) cove=60.47 | 4  |
| YALIO1E12795r | 1552875 | 1552993 |   | 5SRNA                     |    |
| YALIO1E19833r | 2367494 | 2367564 |   | tRNA Gly (GCC) cove=64.77 | 4  |
| YALIO1E19835r | 2367569 | 2367687 |   | 5SRNA                     |    |
| YALIO1E27322r | 3238316 | 3238434 | c | 5SRNA                     | 4  |
| YALIO1E27324r | 3238439 | 3238509 | c | tRNA Gly (GCC) cove=64.77 |    |
| YALIO1E29799r | 3531926 | 3532007 |   | tRNA Glu (CTC) cove=60.26 | 4  |
| YALIO1E29801r | 3532012 | 3532130 |   | 5SRNA                     |    |
| YALIO1E30239r | 3569382 | 3569452 |   | tRNA Gly (GCC) cove=64.77 | 4  |
| YALIO1E30241r | 3569457 | 3569575 |   | 5SRNA                     |    |
| YALIO1E30437r | 3585610 | 3585695 |   | tRNA Asp (GTC) cove=57.93 | 4  |
| YALIO1E30439r | 3585700 | 3585818 |   | 5SRNA                     |    |
| YALIO1F05366r | 802929  | 803047  | c | 5SRNA                     | 4  |
| YALIO1F05368r | 803052  | 803122  | c | tRNA Gly (GCC) cove=64.77 |    |
| YALIO1F09898r | 1346340 | 1346458 | c | 5SRNA                     | 4  |
| YALIO1F09900r | 1346463 | 1346547 | c | tRNA Gln (CTG) cove=57.33 |    |
| YALIO1F18060r | 2405305 | 2405423 | c | 5SRNA                     | 4  |
| YALIO1F18062r | 2405428 | 2405498 | c | tRNA Gly (GCC) cove=64.77 |    |
| YALIO1F19932r | 2665039 | 2665126 |   | tRNA Asp (GTC) cove=57.69 | 4  |
| YALIO1F19934r | 2665131 | 2665249 |   | 5SRNA                     |    |
| YALIO1F25947r | 3337927 | 3338045 | c | 5SRNA                     | 5  |
| YALIO1F25949r | 3338051 | 3338138 | c | tRNA Asp (GTC) cove=56.91 |    |
| YALIO1F26739r | 3413815 | 3413933 | c | 5SRNA                     | 4  |
| YALIO1F26741r | 3413938 | 3414008 | c | tRNA Gly (GCC) cove=64.77 |    |
| YALIO1F26939r | 3429923 | 3429993 |   | tRNA Gly (GCC) cove=64.77 | 4  |
| YALIO1F26941r | 3429998 | 3430116 |   | 5SRNA                     |    |

### 3- Coordinates of the 13 tDNA-Trp (CCA)-RUF70 dicistronic genes.

The 13 tDNA-Trp (CCA)-RUF70 dicistronic genes are numbered according to their location in the genome from chromosomes A to F. Start coordinate of tDNA is that of mature nt #1, end coordinate is that of nt #73, start coordinate of RUF70 genes are that of the nucleotide following nt #73 of tDNA, end coordinate is that of the first nucleotide following the terminal T-track (see Fig. 2).

|        | tDNA-Trp (CCA) |         | RUF70 gene |         |
|--------|----------------|---------|------------|---------|
|        | start          | end     | start      | end     |
| 1 A <  | 861901         | 861816  | 861815     | 861774  |
| 2 A >  | 1404668        | 1404753 | 1404754    | 1404832 |
| 3 A <  | 1424537        | 1424452 | 1424451    | 1424374 |
| 4 A <  | 1568219        | 1568134 | 1568133    | 1568048 |
| 5 B >  | 2652246        | 2652332 | 2652333    | 2652406 |
| 6 C <  | 286336         | 286251  | 286250     | 286173  |
| 7 C >  | 664941         | 665028  | 665029     | 665104  |
| 8 C <  | 2551313        | 2551228 | 2551227    | 2551156 |
| 9 D <  | 210924         | 210839  | 210838     | 210762  |
| 10 E < | 1739685        | 1739600 | 1739599    | 1739511 |
| 11 E < | 2547332        | 2547246 | 2547245    | 2547173 |
| 12 F < | 1021277        | 1021192 | 1021191    | 1021113 |
| 13 F < | 3423047        | 3422964 | 3422963    | 3422887 |

### 4- Sequences of oligonucleotides used for RT-PCR and cloning.

| Oligos for RT-PCR     | forward                 | reverse                 |
|-----------------------|-------------------------|-------------------------|
| tDNA-Gly (GCC)-5S RNA | GCGCCGATGGTTTAGTGGTAA   | ATTACAGCACCCAGGATTCTCG  |
| tDNA-Asp (GTC)-5S RNA | TCCGCAATAGTTTAGTGGCTAG  | ATTACAGCACCCAGGATTCTCG  |
| tDNA-Glu (CTC)-5S RNA | TCCGATATAGTGTAGGGGCTAT  | ATTACAGCACCCAGGATTCTCG  |
| tDNA-Gln (CTG)-5S RNA | GGTTGTATAGTGTAGCGGTTAT  | ATTACAGCACCCAGGATTCTCG  |
| tDNA-Thr (AGT)-5S RNA | GCCTTCGTGGCCAAGTGGTAAG  | ATTGCAGCACCTAGGATTCTCG  |
| tDNA-Lys (CTT)-       |                         |                         |
| tDNA-Glu (CTC)-5S RNA | GCCTGGCTAGCTCAATCGGTAG  | ATTACAGCACCCAGGATTCTCG  |
| tDNA-Trp (CCA)-RUF70  | GATGTGGTGGCTCAATGGTAGAG | TACACCGATCAGCTGAAGCTATG |

#### Oligos used for cloning

|                       |                         |                         |      |
|-----------------------|-------------------------|-------------------------|------|
| tDNA-Gly (GCC)-5S RNA | TTGTCGTGGTCTCGTGGTAGTG  | ATAACGGCAGAAGAACACAGCC  | (#1) |
| tDNA-Asp (GTC)-5S RNA | TTTCATCACATTTGCTCTCTTCG | TATACATCGATGGGCAGATTAC  | (#3) |
| tDNA-Glu (CTC)-5S RNA | CTGAATCTTTGCGATGTGCGCT  | ACGTGACTAGAGTGGTTGTTCC  | (#2) |
| tDNA-Gln (CTG)-5S RNA | TTGTCGTCTGTAACGCTCCTAC  | GATTGTGCGACTCAAGCACAAG  | (#1) |
| tDNA-Thr (AGT)-5S RNA | AGGCCAAAACAGCGAAGATACG  | CACATGGCAAAACACATGGGC   | (#1) |
| tDNA-Lys (CTT)-       |                         |                         |      |
| tDNA-Glu (CTC)-5S RNA | TCTCGAGGTAGTGAATCATGGC  | CCAATTGCATATGCAAGTCGGG  | (#0) |
| tDNA-Trp (CCA)-RUF70  | AGCTGTTTTGCGCATAATCCTG  | TACACCGATCAGCTGAAGCTATG |      |

## 5- Sequences and alignment of TFIIIA orthologs in hemiascomycetes and *S. pombe*.

Amino acid sequence of TFI<sub>II</sub>A orthologues were aligned with MAFFT (Kato et al., 2002) and visualized with Genedoc (<http://www.psc.edu/biomed/genedoc>). SACE, *Saccharomyces cerevisiae* YPR186c; CAGL, *Candida glabrata* CAGL0G10021g; VAPO, *Vanderwaltozyma polyspora* A7TF03\_VANPO; KLLA, *Kluyveromyces lactis* KLLA0B03454g; ERGO, *Eremothecium gossypii* AEL278Wp (Q758N3\_ASHGO); DEHA, *Debaryomyces hansenii* DEHA0C07623g; CAAL, *Candida albicans* CA1157|PZF1; YALI, *Yarrowia lipolytica* YALI0F05104g, SCPO, *Schizosaccharomyces pombe* SPAC144.09c (NP\_594670).

Cys and His residues of the 9 zinc fingers common to all TFI<sub>II</sub>A's in Hemiascomycetes are indicated in bold under the alignment; those from the 10th zinc finger specific to TFI<sub>II</sub>A of *Y. lipolytica* are indicated in italics.

Kato K, Misawa K, Kuma K & Miyata T (2002) MAFFT: a novel method for rapid multiple sequence alignment based on fast Fourier transform. *Nucleic Acids Res* 30(14): 3059-3066.

### *Saccharomyces cerevisiae* (SACE)

```
>YPR186c Tfc2 (Pzf1) 429 aa
MGGEVLNNEGMP LAELKQETIPISRSESSESLNSLTSTRSSSSNRPKTYF
CDYDGCDAFTRPSILTEHQLSVHQGLRAFQCDKCAKSFVKKSHLERHLY
THSDTKPFQCSYCGKGVTTROQLKRHEVTHTKSFICPEEGCNLRFYKHPQ
LRAHILSVHLKLTCPHCNKSFORPYRLRNHISKHHDPEVENPYQCTFAG
CCKEFRIWSQLQSHIKNDHPKPKCPCSKPCVGENGLQMHMIHDDSLVT
KNWKCHICPDMFSRKHDLTHYGSIHTEEDIPELKYKISDIQQLVQDH
GVQLGNSKHSNEQDEEKISNRLRKRRLTENNNVEFLQNEVDLEKRLESG
ENGLNLLLNTVGRKYRCFYNNCSRFTFKTKKEYEKHIDKHKVHELKLIKILQ
EKEENKTLVDQNHKEPFI IQKETQSAGDK
```

### *Candida glabrata* (CAGL)

```
>CAGL0G10021g 394 aa
MEANDVFDSQVPLSRSSSVGSMSSVASGSSVRSKTYLCEYDNCDAFTRP
SLLTEHQNTVHLGRKPWKNQCESSFTKKIHLEHLYTHTDERPFYCSFC
GGLITRQQLKRHEVTHTKSFNCEYEGCNESFYKHPQLRAHILAVHLQSL
KCHECNKSFORPYRLKNHIAKHHNPVFNAYQCTFSVCSKSFKTWSALRL
HVKNDDHPKPKCPCSKPCVGEDGLNMHMKIH DENLVSRNWKCHICNDQSF
AKKLELLDHYSNSHSEEIPAYLLEQKVVPYVETNVTGKTECEKSPTKKYV
KATDMLAIRTEITLNRFFDGGKDAMTLLLNTVGRKFRCPYSKCYRSFKTE
EKYNIHIEKHRIHEQKLELETSGLQADIEPDRQSTALEKEE
```

### *Vanderwaltozyma polyspora* (VAPO)

```
> A7TF03 | A7TF03_VANPO
MEELSLWKSECTPPLQRTNTGGGGGSSGSVTSSTASRSKRFFCDYDGCDA
KAFSRPVLLTDHQQSVHLRIKPFKCDQCSAFSKKSHLERHLFSHSSEKP
FTCAVCNKGLTTRQQLKRHEITHTKSFVCPHDGCSESFYKHPQLRSHILA
VHLQKLRQCQKDFORPYRLRLHIAKHHNPVFNAYQCTFGGCSLSFKT
WTALQTHTKNDHPKPKCAICDKPCVGEAGLQMHMEVHNEFLVAKNWKCSK
CDPPI SFVKKNELITHYLEIHKEELPPGLVESASEPTSKVAESPANEILT
RAKRRKLNNASAVLNEEKLEEYLESGNSGLSLLLNTVGRRLKCKYLGCSR
TFKTEERYDKHIIHRKIHLEKLIKIAITKEDTDKE
```

*Kluyveromyces lactis* (KLLA)

>KLLA0B03454g 472 aa

MKFIKQAMRCDWVRRFTPIHGIPNRVMDYLGNVVVATDESVMVAPTYN  
KENEVRQNVVGENDDDDQCCVPTPPLTRSEMSVMSMASVTSTVSVSSS  
QRSKVYFCDYQGCNKSFTRPSSLTEHQLTVHHGIKPFKCDTCGKEFAKKS  
HLNRHMFSTDDKPFCTCSICGKGVTTROQLKRHEITHTKSFHCSYEGCNE  
SFYKHPQLRSHILSVHEKLTCPHCNKTFQRPYRLKNHIDKHHNPESTGM  
YQCDFLSTDFVSTWSSLOQHIKQCHPKLPICGKPCVAESGLRNHMMI  
HDESLVTKNWKCSSCPDTSFAKKTQLVQHYESHKDVPPELLLLPTDADE  
DTNIKVNTDIKISETEDSFSSGKKTLLDFPSFSKRRKVDLGSVEAEIKI  
KKYIESGKTTKSLLLNTVQKRCPCYTNCNRTFKSKEKFDTHIEKHKIHE  
LKMKILEDENQKSSKNDHARKI

*Eremothecium gossypii* (ERGO)

>AEL278W (NP\_984582) 476 aa

MCSCQAIWSWIDQSDQSGCVLFASVAQPLGRHRNLGAPSLEQVKIGGKSS  
PDRAHLTIIGCAARSRGKMEAHKLVHGLEELPVDEVTDYALSRTTSAGS  
TVSLSSVESTASSTRKTHYCDYEGCYKAFTRPSLLTEHQOTAHQIRAY  
QCEQCGRGFTKKSHLERHLFSHSETKPFCTVCGKGVTTROQLRRHEITH  
TKSFKCPHEGCGEAFYKHPQLRSHVLAVHEQKLTCTHCDKRFQRPYRLKT  
HIAKHHGPASQFRYQCTNAGCVQCFETWSALQOHLHTDHPKLPBGVCGKL  
CVGETGLQMHMTVHDESRVIKNWKCVCSDTTYAKMADLLAHYMKTHGDS  
IPKELIEHVNAESPVVHVDEQQREDPEIVRPQKRRKNSDNTIMGSLQTE  
EKIRKLIESGRGLSLLNNTAGRKKRCPYLGCSRVPFKTEDKYDLHISKHK  
INDLKVKLLEDKLTAAAAGKDPACG

*Debaryomyces hansenii* (DEHA)

>DEHA0C07623g 452 aa

MESSETASVSSRASSSSARPKNYICDEPDCGKAYSKPSLLEQHKRSHTNE  
RPFKSETGCDKSFRLKSHLQAHLLEDQESKPFQCATCGKGVNTLQHL  
KRHEITHTKSFICTFEGCNESFYKHQSLRHHTLSVHEKLLCNKCNKSN  
RPYRLAQHNIKYHSDSPAYQCDHQGCFGNFMTWSALQLHIKTEHPKIKCP  
ICGKGCVGKGLRSHMNIHDEEKIVKLWNCNYCNIGKFKADLIDHYNT  
YHDRNLPDDLKPIEREQLDKLLSEKDNIDFNLTLEGLQSKGFVEVPSD  
EEKEENDYMSNGLQASHKSLNSLNLTLSEKASIVDLILNNYLKRKVPKP  
KKNCDRMFSRDYDLERHLKWHESHLLKIEAFLKSLELEKVPDSNMHDKR  
LFPENDEPVMATKRHHAMESDDDFELDDLIDEELKSIQAGQTASNNTTN  
VK

*Candida albicans* (CAAL)

>PZF1 (EAK91019) 412 aa

MSEDETKSISLSSSSSRPKKYICTYEGCDKAYNRPSLLEQHLRTHS  
NDRPYKCTVEDCDKAFFRKSHLETHIVSHSEKPFHCSVCGKGVNSRQHL  
KRHEITHTKSFKCTFENCQEAIFYKHQSLRHHILSVHEKTLTCKQCCKVFT  
RPSKLAQHKLKHGGSPAYQCDHPGCFKNFQTWSVLQFHQSHPKLKCP  
KCGKGCVGKGLSSHMLSHDDSTMIKIWTCDYCDVGKFAKKNELVEHYNI  
FHDGNI PDDLKETEVEVKLENLLDQGSKLNNLHELETEKLVKVEEDEEDEE  
DSLDEKRSVRSDSMSAQRSIKSFTASLEGSKSVSKLISNSGKKINCPKN  
NCDRMFSREYDLRRHLKWHDDNLQRIESFLNSIEKEETPEGEPLVKKARM  
DLLPNETSVISR

*Yarrowia lipolytica* (YALI)

>YALIOF05104g 655 aa  
MFHEAELSDTPDGIHYDLPSRPTSAAASSASSPVSSSEWIEVKDAHGNPKR  
VPERKGLFFPTRGETYGDWNGNVPKEKTTVKRTLAVHCPEEGCDKAYSR  
PSLLKQHLSHYNERCFVCTYEGCGKGFRRSHLKAHTNSHTVAKRYHCS  
FCAKGFNTRQHLLRHEVTHKSIKHCPHQDCSKQCRTEVQLLEHCVADHAT  
WKHQCTYPECGRAIGSERQMZYHWERDHNQTPQYKCPHDECEEVASQWIK  
LQKHVSKAHRNWLCHHCEGIFDDVQSMYEHEKSVHGLSVLYRGGHRTPGY  
VRQLWTCPEESCGHQSFDKDLYAKHYVSHNKAPVRDMFESVAEYDITPEI  
IPYFEKPEKLTRKGRSERTSLEGKSGEEYQLPSERPAKRQRREVSKPTN  
TAASIVDKITGAGYSDSRTIPCVVETCMHRFNRYDLDRHVAANHATNCA  
VCPFGSHILTEVRDHMSDEHRTEWPAECYQASPDAAHIKIHLAYLRGETPE  
VEPVNTTSQNMKNLHYPTPGLRRNAPRGQSNSSYNSPLHSPIIQVPQRA  
HSESPMHMYGNSYQPIQHTSPISVTSYPTQTPTPGSIGSPAPLQQLNEAV  
EYAPFDLPLSAMSSAYVSPALSHSILAGGHMEYSSNEEVNFTKDSIDP  
ELFRQ

*Schizosaccharomyces pombe* (SCPO)

>SPAC144.09c (NP\_594670) 374 aa  
MCHFNELSIEIESKNLRSAKKIFHCPYEECGKKYSRPSLLEQHLRTHSNE  
RPFVCDYTGCSKAFYRKSHLKIHKRCHTNVVKPFCHYDGCDAQFYTQOHL  
ERHIEVHRKPKPYACTWEGCDECFSKHQQLRSHISACHTHLLPYPTYQD  
CELRFATKQKLQNHVNRAHEKIIISYSCPHESC VGHEGF EKWSQLQNHIRE  
AHVPSCSICGRQFKTAAHLRHHVVLHQTTLEERKTYHCPMEGCKKSFTRS  
SALKKHISVIHEGNMAFHCDSCGTFKGYKHM LQRHLERGTCKKAHKPYIN  
ECGIKHDGIEGVAIHDQKEKELSSNLVSDVAKKIINEVTGHGYKEAREYS  
CSFPECNYRFKRLYDMHRHLNSHH

SACE : -----MGGEVLNN-EGMPLA-----ELKQETIP----- : 22  
CAGL : -----MEANDVFD-SQV-----P----- : 12  
VAPO : -----M-EELSLW-----KSEC---TPP----- : 14  
KLLA : -----MKFIEKTO-AMRCDWVRRFTPIHGIPNRVMDYLGNVVATDESVMVAPTYNKENEVQRNVVGENDDDDQCCVPTPP----- : 75  
ERGO : MCSQAIWSWIDQSDQSGCVLFAVSAQPLGRHRNLGAPSLQVQKIGGKSSPDRHLTIIGCAARSRGKGMHAHKLHVHGLEELPVDEVTDY : 90  
DEHA : ----- : -  
CAAL : ----- : -  
YALI : -----MFHEAELSDTPDGI THYDLP SRPTS AASSASSPV SSEWIEVKD-----AHGNPKRVP ERKGLF : 58  
SCPO : -----MCHFNE----- : 6

100 \* 120 \* 140 \* 160 \* 180  
SACE : -I R S E S E S L N S L T S T R S S --- S S N P K T Y F C D Y D G C D K A F I R P S I L T E H O L S V H Q G L R A F Q C --- D K C A K S F V K K S H L E R H L Y T H S D T : 105  
CAGL : -L S R S S S V G G M S S V A S --- G S S V S R S T Y L C E D N C D K A F I R P S I L T E H O N T V H L G R K F W K C --- N Q C E S S F T K K I H L E R H L Y T H D E : 92  
VAPO : -L Q R T N T G G G G G S S G S V T S --- S T A S S R K R F C D Y D G C D K A F I R P V I L L T D H Q C S V H L R I K E F F K C --- D Q C D S A F S K K S H L E R H L P S H S S E : 98  
KLLA : -L T R S E S M D S V M S M A S V T S T V S V S S O S V V F C D Y Q C C N K S F I R P S I L T E H O L T V H H G I K E F F K C --- D T C G R E F A K K S H L N R H M P S H D D : 162  
ERGO : A L S R T S A G S T V S L S S V E S T --- A S S T R K T H Y C D E G C Y K A F I R P S I L T E H O Q T A H O G I R A Y Q C --- E Q C G R G F T K K S H L E R H L P S H S E T : 175  
DEHA : -M E S S E T A S V S S R A S --- S S A R P K N Y I C D E P D C G K A Y S K P S L L E O H K R S -H T N E R E F F K C S E T G C D N S F I R K S H L Q A H L L S H E D Q : 80  
CAAL : -M S E S D E T K S I S S L I S S --- S S S S P K K I I C T Y E G C D K A Y N R P S L L E O H L R T -H S N D R E F Y K C T V E D C D K A F I R K S H L E T H I V S H S E K : 82  
YALI : F P I R G E T Y G D A W N G N V P K E K --- T V K T L L A H V P E E G C D K A Y S R P S L L K O H L R S -H Y N E R C F V C T Y E G C G R G F P R R S H L K A H T N S H V A : 144  
SCPO : -L S T E I E S K N L R S A --- K K I T H C P E E C G K Y S R P S L L E O H L R T -H S N E R F F V C D Y T G C S R A F Y R K S H L K T H K R C H N V : 80  
C C H H C C H H H

\* 200 \* 220 \* 240 \* 260 \*  
SACE : -K F F Q C S Y --- C G K G V T T R O O L K R H E V T H --- T K S F I C P E E G C N L R F Y K H P O L R A H I L S V H L H K I --- T C --- P H C N K S F O R P Y L R N H I S K H : 185  
CAGL : -R E F Y C S F --- C G K G I T T R O O L K R H E V T H --- T K S F N C E Y E G C N E S F Y K H P O L R A H I L A V H L Q S I --- K C --- H E C N K S F O R P Y L R N H I S K H : 172  
VAPO : -K F F T C A V --- C N K G I T T R O O L K R H E I T H --- T K S F V C P H D C S S E S F Y K H P O L R S H I L A V H L O K I --- R C --- Q H C S D F O R P Y L R L R L H I A K H : 178  
KLLA : -K F F T C S I --- C G K G V T T R O O L K R H E I T H --- T K S F H C S Y E G C N E S F Y K H P O L R S H I L S V H E K K I --- T C --- P H C N K T F O R P Y L R N K N H I D K H : 242  
ERGO : -K F F S C T V --- C G K G V T T R O O L R R H E I T H --- T K S F K C P H C C G E A F Y K H P O L R S H V L A V H E Q K I --- T C --- T H C D R F O R P Y L R K T H I A K H : 255  
DEHA : E S K F F O C A T --- C G K G V N L O H L K R H E I T H --- T K S F I C P F E C C N E S F Y K H Q S I R H H T S V H E K K I --- L C --- N K C N S E N P R Y S L A O H N I K Y : 162  
CAAL : -K F F H C S V --- C G K G V N S R O H L K R H E I T H --- T K S F K C T F F E C C N E S F Y K H Q S I R H H L S V H E K T I --- T C --- K C N K V T T R P S L A O H K L A H : 162  
YALI : -K R Y H C S F --- C A K G F N T R O H L L R H E V T H --- K S I K H C P H O D C S Q C R T E V O L D E H C V A D H A T W K -H Q C T Y P E C G R A I G S E R O M Q Y H W E R D : 227  
SCPO : -K F F S C H Y D G C D A Q F Y T O O L E R H I E V H R K P P V A C T W E C C D C E S K H Q O L R S H I S A C H T H L P Y P C T Y Q D C E L R A T K O L Q N E V N R A : 168  
C C H H C C H H C C H H C C H H

280 \* 300 \* 320 \* 340 \* 360  
SACE : H D P E V E N P Y O C T F A G C C --- K E F R I W S A L Q S H I K N D H P K L K C P I C S K P C V G E N G L Q M H I I -H D D S L --- I T K N W K C H I --- C : 258  
CAGL : H N P D V N V A Y O C T F S V C S --- K S E K T W S A L R L H V K N D H P K L K C P I C S K P C V G E D G L N M H I K -L H D E N L --- V S R N W K C H I --- C : 245  
VAPO : H N P D V E N P Y O C T F G G C S --- L S E K T W A L O T H T K N D H P K L K A I C D K P C V G E A G L Q M H I E -V H N E F L --- V A K N W K C S K --- C D : 252  
KLLA : H N P E S T G M Y C D F L S C T --- D V E S W S L Q O H I K Q C H P L K P C I C K P C V A E S L R N H M -L H D E S L --- I T K N W K C S S --- C : 315  
ERGO : H G P A S Q R F Y O C T N A G C V --- Q C F E T W S A L Q O H I H T D H P K L P G C V C G K L C V G E T G L Q M H I T -V H D E S R --- I L K N W K C S V --- C : 328  
DEHA : H S D S P --- A Y O C D H Q G C F --- G N E M T W S A L O L H I K T E H P K I K C P I C G K G C V G K K G L R S H N -H H D E E K --- I V K L W N C N Y --- C : 233  
CAAL : H G G S P --- A Y O C D H P G C F --- K N F Q T W S V L O F H I K Q S H P L K C P K C G K G C V G K K C S S H L -S H D D S T --- I K I T A T C D Y --- C : 233  
YALI : H N Q T P --- Q Y K C P H D E C E --- E V A S O W I K L O K H V S K A H N W L C H H C E G I F D D V O S M Y E H E K S V H G L S V L Y R G G H R T P G Y R O L T W C P E E S --- C : 312  
SCPO : H E K I I --- S V S C P H E S C V G H E G E K E W S O L O N H I R E A H V P -S S I C G R O F K T A A H L R H H V -L H O T T L E --- E R T V H C P M E G C --- C : 243  
H C C H H C C H H C C H H C C H H

\* 380 \* 400 \* 420 \* 440 \*  
SACE : P D M S F S R K H D L L T H Y G S I H -T E E D I P L E L --- K Y K I S D I Q --- Q V Q D H G V Q L G N S K H S N E Q D E E K I S N R L R K R R K L T E N N N V E F L Q N : 339  
CAGL : N D Q S F A K K L E L D D H Y S N S H -S E E P A Y L L --- E Q K V V P Y V --- E T N V -T G K T E C E K S P T --- K R Y V K A T M L A I R --- T : 310  
VAPO : P P I S F V K K N E L I T H Y L E I H -K E E P P G L V --- E S A S E P T S --- K V A E --- S P A N E I L T R --- A K R R K L N N A S A V L --- N : 315  
KLLA : P D T S F A K K T O L V Q H Y E E S H -K D V D P E L L L L P T D A D E D T N I --- K V N T D I K I S E T E D S F S S G K K T L L D F P S F S K R K V D E L G S V E --- A : 396  
ERGO : S D T T Y A K M A D I A H Y M K T H -G D S I P K E L E H V N A E S P A V V --- H V D E Q Q R E D P E I V R P --- Q K R R N S D N T I M G S L T : 399  
DEHA : N I G F V K K A D I D H Y N T Y H -D R N P D D L K P I E R E Q L D K L L S E K D S T N I D F N T L E G L Q S K G F V E V P S D E E K E E N D Y M S N G L Q A S H K --- S : 319  
CAAL : D V G F A K K N E L V E H Y N I F H -D G N P D D L K E T E V K K L E N L L D Q G S K I N N L H E L E T --- E K L K V E E D E E D E S L D E K R S D V R S D S M A Q R S : 320  
YALI : G H O S F D K D L -Y A K H V S -H N K A P V R D M F E S V A E Y D I T P --- E I P Y F E K P E K L T R K G R S E R T S L E G K S G E E Y Q L P S E R P A K --- R Q : 391  
SCPO : -K K S F T R S S A K K I S V I H -E G N I -A F H C D S C G P K F G Y K H --- M L Q R H L E R G T C K K A H K P Y I N E C G I K H D G I E G V A I H D Q K E --- K : 320  
H H H C C H H C C H H C C H H

460 \* 480 \* 500 \* 520 \* 540  
SACE : E V D I E K R L E S G E -N G I N L L L N T V --- G R K Y R C F Y N N C S R T E K T K E K Y E K H I -D K E K V H --- : 392  
CAGL : E T N N R F F D G G K -D A M T L L L N T V --- G R K F R C P Y S K Y R S E K T E E K Y N I H I -E K E R I H --- : 363  
VAPO : E E K L E E Y L E S G N -S G I S L L L N T V --- G R R L K C K Y L G C S R T E K T E E R Y D K H I -H R E K I H --- : 368  
KLLA : E I K K K Y I E S G K -T T K S L L L N T V --- G Q R R K C P Y T N C N R T E K S K E K F D T H I -E K E K I H --- : 449  
ERGO : E E K R K L I E S G R -T G I S L L L N T A --- G R K K R C P Y L G C S R V E K T E D K Y D L H I -S K E K I N --- : 452  
DEHA : L N S N L T L E S G K A S I V D I L L N Y L --- K R K V P C P K K N C D R M S R D Y D L E R H L -K W H E S H --- : 374  
CAAL : I K S F T A S L E G S K -S V S K I S N S --- G K I N C P K N N C D R M S R B Y D L R H H -K W H D D N --- : 372  
YALI : R R E V S K P T N T A A -S I V D K I T G A G Y S D S T I P C V V E T C M H R E N R K Y D L D R H V A A N A T N C A V C P F G S H I L T E V R D H M S D E H R T E W P A E C Y Q : 480  
SCPO : E L S N L V S D V A K -K I I N E V T G H G Y K E A E Y S C S F P E C N Y R E K R L Y D M H R H L -N S H I --- : 374  
C C H H C C H H C C H H C C H H

\* 560 \* 580 \* 600 \* 620 \*  
SACE : -----E L K I K I L Q E K E E N K T L-----V D Q N H K E P F I I Q K E T Q S A G D K----- : 429  
CAGL : -----E Q N K E L E T S G Q L Q-----M A D I E P D R Q S T A L E K E E----- : 394  
VAPO : -----E L K I K I A I T K E D T D K E----- : 384  
KLLA : -----E L K K I L E D E N Q K-----S S K N D H A R K I----- : 472  
ERGO : -----D L K V K L L E D K L K T E A-----A A G K D P A C G----- : 476  
DEHA : -----L K K I E A F L K S L E L E K V P D S N M H D K R L F P E N D E P V M A T K R H H A M E S S D D D F E L D D L I D E E L K S I Q A G Q T A S N N T T N V K----- : 452  
CAAL : -----L Q R I E S F L N S I E K E E-----T P E G E P L V K A R M D L L P N E T S V I S R----- : 412  
YALI : A S P D A H I K I H L A Y L R G E T P E V E P V N T T S Q N --- M Y K N L H Y P T P G L R R N A P R Q S N S S Y N S P L H S P I I Q V P Q R A H S E S P M H M Y G N S Y Q P I Q : 567  
SCPO : ----- : -

640 \* 660 \* 680 \* 700 \*  
SACE : ----- : -  
CAGL : ----- : -  
VAPO : ----- : -  
KLLA : ----- : -  
ERGO : ----- : -  
DEHA : ----- : -  
CAAL : ----- : -  
YALI : H T S P I S V T S Y P T Q T P T P G S I G S P A P L Q Q L N E A V E Y A P F D S I P L S A M S A Y Y S P A L S H I L A G G H D M E Y S S N E E V N F T K D S I D P E L F R Q : 655  
SCPO : ----- : -
